# Supplementary material for: Improvements of Age-Related Cognitive Decline in Mice by Lactobacillus helveticus WHH1889, a Novel Strain with Psychobiotic Properties
Source: MDPI journal article supplement (doi:10.3390/nu15173852), 2023-09-03
Supplement: s1 [file s1]

## Supplemental Information

# Improvements of age-related cognitive decline in mice by *Lactobacillus helveticus* WHH1889, a novel strain with psychobiotic properties

**Kan Gao <sup>1,2,3</sup>, Cailing Chen <sup>1,2</sup>, Xueqin Ke <sup>1,2</sup>, Qiuling Fan <sup>1,2</sup>, Haifeng Wang <sup>3,\*</sup>, Yanjun Li <sup>1,2,4</sup>  
and Su Chen <sup>1,2,\*</sup>**

<sup>1</sup> Research and Development Department, Hangzhou Wahaha Group Co., Ltd., Hangzhou 310018, China;  
kevingogh911@hotmail.com (K.G.); chencailing@wahaha.com.cn (C.C.); xueqin.ke@wahaha.com.cn (X.K.);  
qiuling.fan@wahaha.com.cn (Q.F.); lyj@wahaha.com.cn (Y.L.)

<sup>2</sup> Key Laboratory of Food and Biological Engineering of Zhejiang Province, Hangzhou 310018, China

<sup>3</sup> MOE Key Laboratory of Molecular Animal Nutrition, College of Animal Science, Zhejiang University,  
Hangzhou 310058, China

<sup>4</sup> College of Biosystems Engineering and Food Science, Zhejiang University, Hangzhou 310058, China

\* Correspondence: haifengwang@zju.edu.cn (H.W.); chensu@wahaha.com.cn (S.C.)

## SUPPLEMENTARY TABLES

**Table S1.** The precision and accuracy of the ELISA assays in this study

| Items                     | r2     | Precision (%) <sup>1</sup> | Accuracy (%) <sup>2</sup> |
|---------------------------|--------|----------------------------|---------------------------|
| Hippocampal mBDNF         | 0.9997 | 3.23                       | 5.23                      |
| Hippocampal 5-HT          | 0.9996 | 4.12                       | 5.57                      |
| Hippocampal IL-1 $\beta$  | 0.9999 | 2.89                       | 4.22                      |
| Hippocampal IL-6          | 0.9998 | 3.12                       | 4.65                      |
| Hippocampal TNF- $\alpha$ | 0.9999 | 2.98                       | 4.58                      |
| Colonic 5-HTP             | 0.9999 | 2.78                       | 4.23                      |

<sup>1</sup> The precision (agreement between replicate measurements) of the method, as evaluated by the relative deviation (mean of absolute deviation/mean of replicate measurements  $\times$  100%). A value below 5 % indicates the method is highly precise.

<sup>2</sup> The accuracy (the closeness of an experimental value to the true value) of the method, as determined with known amounts of neurochemical factors standards and expressed as the relative errors [(measurement value – true value)/true value  $\times$  100%]. A value below 10 % indicates the method is highly accurate.

**Table S2.** Information on the standard compounds of tryptophan metabolites

| <b>Metabolites</b>            | <b>Abbreviation</b> | <b>CAS<br/>Number</b> | <b>Formula</b> |
|-------------------------------|---------------------|-----------------------|----------------|
| 3-Hydroxyanthranilic acid     | 3-HAA               | 548-93-6              | C7H7NO3        |
| 3-Hydroxykynurenine           | 3-HK                | 2147-61-7             | C10H12N2O4     |
| 5-Hydroxyindoleacetic acid    | 5-HIAA              | 54-16-0               | C10H9NO3       |
| Serotonin                     | 5-HT                | 50-67-9               | C10H12N2O      |
| 5-Hydroxytryptophol           | 5-HTOL              | 154-02-9              | C10H11NO2      |
| L-5-Hydroxytryptophan         | 5-HTP               | 4350-09-8             | C11H12N2O3     |
| 5-Methoxy-3-indoleacetic acid | 5-Me-IAA            | 3471-31-6             | C11H11NO3      |
| Anthranilic acid              | AA                  | 118-92-3              | C7H7NO2        |
| Indole acrylic acid           | IA                  | 29953-71-7            | C11H9NO2       |
| Indole-3-acetic acid          | IAA                 | 87-51-4               | C10H9NO2       |
| Indole-3-acetamide            | IAM                 | 879-37-8              | C10H10N2O      |
| Indole-3-carboxaldehyde       | ICA                 | 487-89-8              | C9H7NO         |
| Indole ethanol/tryptophol     | IE                  | 526-55-6              | C10H11NO       |
| 3-Indoleglyoxylic acid        | IGA                 | 1477-49-2             | C10H7NO3       |
| Indolelactic acid             | ILA                 | 1821-52-9             | C11H11NO3      |
| Indican                       | Indican             | 487-60-5              | C14H17NO6      |
| Indole                        | Indole              | 120-72-9              | C8H7N          |
| 3-Indolepropionic acid        | IPA                 | 830-96-6              | C11H11NO2      |
| Indoxylsulfate                | IS                  | 2642-37-7             | C8H7NO4S       |
| Kynurenine                    | KYN                 | 343-65-7              | C10H12N2O3     |
| Kynurenic acid                | KYNA                | 492-27-3              | C10H7NO3       |
| Melatonin                     | Melatonin           | 73-31-4               | C13H16N2O2     |
| Nicotinic acid                | NA                  | 59-67-6               | C6H5NO2        |
| N-Acetyl-5-hydroxytryptamine  | NAS                 | 1210-83-9             | C12H14N2O2     |
| Skatole                       | Skatole             | 83-34-1               | C9H9N          |
| L-Tryptophan                  | Trp                 | 73-22-3               | C11H12N2O2     |
| Tryptamine                    | Tryptamine          | 61-54-1               | C10H12N2       |
| Xanthurenic acid              | Xa                  | 59-00-7               | C10H7NO4       |
| Indole-3-acetonitrile         | IAN                 | 771-51-7              | C10H8N2        |
| Indole-3-acetyl-alanine       | IAA-Ala             | 57105-39-2            | C13H14N2O3     |
| Indole-3-acetyl-aspartate     | IAA-Asp             | 2456-73-7             | C14H14N2O5     |

**Table S3.** The significantly changed tryptophan metabolites

| Metabolites<br>(nmol/L) | Groups                         |                                |                                | <i>P</i> value | q value <sup>1</sup> |
|-------------------------|--------------------------------|--------------------------------|--------------------------------|----------------|----------------------|
|                         | Control                        | Aged                           | Aged+WHH1889                   |                |                      |
| 5-HT                    | 13827.56±350.25 <sup>b</sup>   | 13509.29±217.08 <sup>b</sup>   | 15056.95±262.81 <sup>a</sup>   | 0.0010         | 0.0021               |
| 5-HTP                   | 183.04±4.78 <sup>b</sup>       | 173.67±8.51 <sup>b</sup>       | 226.45±17.22 <sup>a</sup>      | 0.0100         | 0.0131               |
| NAS                     | 21.66±1.92 <sup>a</sup>        | 17.22±1.05 <sup>b</sup>        | 16.13±0.77 <sup>b</sup>        | 0.0200         | 0.0213               |
| KYN                     | 992.81±45.59 <sup>b</sup>      | 1320.60±60.10 <sup>a</sup>     | 789.81±33.81 <sup>c</sup>      | 0.0000         | 0.0001               |
| KYNA                    | 157.18±13.86 <sup>b</sup>      | 184.53±23.74 <sup>a</sup>      | 97.96±10.83 <sup>c</sup>       | 0.0120         | 0.0146               |
| IS                      | 21443.57±2454.10 <sup>a</sup>  | 23895.37±1591.34 <sup>a</sup>  | 15685.47±1475.61 <sup>b</sup>  | 0.0170         | 0.0193               |
| IAA                     | 771.99±86.51 <sup>a</sup>      | 936.45±101.21 <sup>a</sup>     | 404.02±38.18 <sup>b</sup>      | 0.0004         | 0.0021               |
| IE                      | 1.20±0.22 <sup>a</sup>         | 1.35±0.13 <sup>a</sup>         | 0.60±0.05 <sup>b</sup>         | 0.0050         | 0.0077               |
| ILA                     | 1980.60±106.38 <sup>b</sup>    | 2489.95±209.42 <sup>a</sup>    | 1781.18±121.58 <sup>b</sup>    | 0.0100         | 0.0131               |
| 3-HAA                   | 20.04±2.25 <sup>b</sup>        | 46.62±10.15 <sup>a</sup>       | 16.73±2.44 <sup>b</sup>        | 0.0050         | 0.0077               |
| 3-HK                    | 143.48±10.23 <sup>b</sup>      | 315.64±31.72 <sup>a</sup>      | 125.50±17.17 <sup>b</sup>      | 0.0000         | 0.0001               |
| AA                      | 51.70±5.05 <sup>b</sup>        | 74.19±5.81 <sup>a</sup>        | 41.29±4.67 <sup>b</sup>        | 0.0010         | 0.0021               |
| IAA-Asp                 | 0.40±0.16 <sup>b</sup>         | 1.97±0.31 <sup>a</sup>         | 0.79±0.29 <sup>b</sup>         | 0.0010         | 0.0021               |
| ICA                     | 269.00±22.60 <sup>b</sup>      | 405.58±29.46 <sup>a</sup>      | 288.08±29.37 <sup>b</sup>      | 0.0040         | 0.0076               |
| IGA                     | 52.60±5.40 <sup>b</sup>        | 76.63±8.44 <sup>a</sup>        | 53.96±5.30 <sup>b</sup>        | 0.0280         | 0.0280               |
| Trp                     | 112092.82±3681.80 <sup>b</sup> | 140577.15±6487.28 <sup>a</sup> | 108475.90±6200.60 <sup>b</sup> | 0.0010         | 0.0021               |
| Xa                      | 314.34±14.92 <sup>b</sup>      | 436.01±18.37 <sup>a</sup>      | 323.93±30.60 <sup>b</sup>      | 0.0010         | 0.0021               |

<sup>1</sup> q values were calculated based on the *P* values with FDR correction.

**Table S4.** The top 20 significantly changed microbial genera revealed by the LefSe method<sup>1</sup>

| Top 20 Significantly Changed Genera     | Groups                  |                         |                         | LDA score | P value | q value <sup>2</sup> |
|-----------------------------------------|-------------------------|-------------------------|-------------------------|-----------|---------|----------------------|
|                                         | Control                 | Aged                    | Aged+WHH1889            |           |         |                      |
| <i>unclassified Muribaculaceae</i>      | 33.70±4.35 <sup>b</sup> | 20.93±2.92 <sup>c</sup> | 50.52±3.47 <sup>a</sup> | 6.17      | 0.0013  | 0.0024               |
| <i>Lachnospiraceae_NK4A136_group</i>    | 5.57±1.32 <sup>c</sup>  | 19.32±2.15 <sup>a</sup> | 9.27±2.98 <sup>b</sup>  | 5.84      | 0.0026  | 0.0035               |
| <i>Lactobacillus</i>                    | 15.04±7.26 <sup>a</sup> | 2.62±1.04 <sup>c</sup>  | 4.82±0.92 <sup>b</sup>  | 5.79      | 0.0235  | 0.0235               |
| <i>unclassified Clostridiales</i>       | 1.92±0.17 <sup>b</sup>  | 10.90±2.07 <sup>a</sup> | 2.22±0.51 <sup>b</sup>  | 5.65      | 0.0005  | 0.0020               |
| <i>Muribaculum</i>                      | 4.62±0.54 <sup>a</sup>  | 1.49±0.18 <sup>b</sup>  | 3.80±0.43 <sup>a</sup>  | 5.19      | 0.0005  | 0.0020               |
| <i>Prevotellaceae_UCG_001</i>           | 2.96±0.48 <sup>a</sup>  | 0.39±0.11 <sup>c</sup>  | 1.20±0.31 <sup>b</sup>  | 5.11      | 0.0005  | 0.0020               |
| <i>Ligilactobacillus</i>                | 3.06±0.53 <sup>a</sup>  | 0.86±0.22 <sup>b</sup>  | 1.13±0.22 <sup>b</sup>  | 5.04      | 0.0023  | 0.0033               |
| <i>unclassified Desulfovibrionaceae</i> | 0.59±0.18 <sup>b</sup>  | 2.70±0.30 <sup>a</sup>  | 0.71±0.18 <sup>b</sup>  | 5.02      | 0.0004  | 0.0020               |
| <i>Mucispirillum</i>                    | 0.55±0.34 <sup>b</sup>  | 2.22±0.66 <sup>a</sup>  | 0.13±0.02 <sup>b</sup>  | 5.02      | 0.0015  | 0.0025               |
| <i>Prevotellaceae_NK3B31_group</i>      | 1.35±0.62 <sup>a</sup>  | 0.07±0.05 <sup>b</sup>  | 0.91±0.25 <sup>a</sup>  | 4.81      | 0.0140  | 0.0149               |
| <i>Oscillibacter</i>                    | 0.46±0.10 <sup>b</sup>  | 1.40±0.22 <sup>a</sup>  | 0.35±0.04 <sup>b</sup>  | 4.72      | 0.0007  | 0.0023               |
| <i>Roseburia</i>                        | 1.14±0.33 <sup>a</sup>  | 0.42±0.05 <sup>b</sup>  | 0.08±0.05 <sup>c</sup>  | 4.72      | 0.0012  | 0.0024               |
| <i>Alloprevotella</i>                   | 0.63±0.14 <sup>b</sup>  | 1.47±0.32 <sup>a</sup>  | 0.44±0.13 <sup>b</sup>  | 4.71      | 0.0142  | 0.0149               |
| <i>Colidextribacter</i>                 | 0.56±0.09 <sup>b</sup>  | 1.50±0.19 <sup>a</sup>  | 0.51±0.09 <sup>b</sup>  | 4.69      | 0.0011  | 0.0024               |
| <i>Desulfovibrio</i>                    | 0.62±0.15 <sup>b</sup>  | 1.27±0.22 <sup>a</sup>  | 0.38±0.10 <sup>b</sup>  | 4.65      | 0.0070  | 0.0085               |
| <i>unclassified Firmicutes</i>          | 0.59±0.09 <sup>b</sup>  | 1.42±0.17 <sup>a</sup>  | 0.58±0.05 <sup>b</sup>  | 4.63      | 0.0004  | 0.0020               |
| <i>Rikenella</i>                        | 0.32±0.14 <sup>b</sup>  | 0.90±0.14 <sup>a</sup>  | 0.16±0.03 <sup>b</sup>  | 4.57      | 0.0023  | 0.0033               |
| <i>unclassified Peptococcaceae</i>      | 0.23±0.08 <sup>b</sup>  | 0.86±0.12 <sup>a</sup>  | 0.20±0.03 <sup>b</sup>  | 4.52      | 0.0011  | 0.0024               |
| <i>Anaerotruncus</i>                    | 0.15±0.05 <sup>b</sup>  | 0.70±0.19 <sup>a</sup>  | 0.10±0.02 <sup>b</sup>  | 4.48      | 0.0012  | 0.0024               |
| <i>Rikenellaceae_RC9_gut_group</i>      | 0.73±0.15 <sup>a</sup>  | 0.85±0.16 <sup>a</sup>  | 0.28±0.06 <sup>b</sup>  | 4.45      | 0.0072  | 0.0085               |

<sup>1</sup> The significantly changed microbial genera were selected by the LefSe method with LDA score >3.0 and q value < 0.05.

<sup>2</sup> q values were calculated based on the P values with FDR correction.

## SUPPLEMENTARY FIGURE

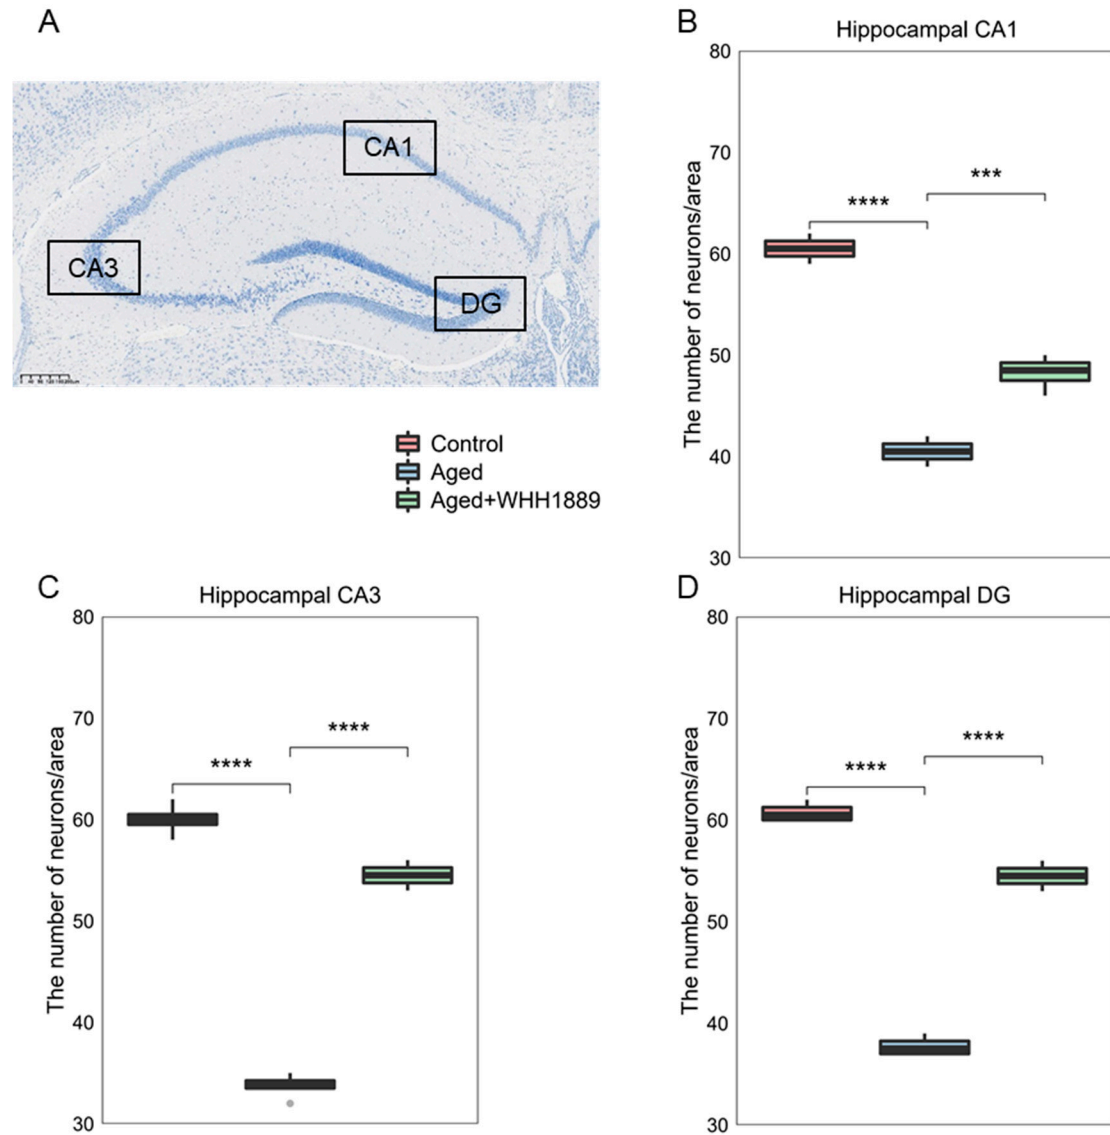

**Figure S1. Effects of WHH1889 on the number of hippocampal neurons in aged mice.** (A) The representative image of Nissl-stained hippocampal CA1, CA3 and DG areas in aged mice. The number of neuronal cells in the CA1 area (B), CA3 area (C), and DG area (D). The results are presented as mediums  $\pm$  95% CI (n=6). \*  $P < 0.05$ , \*\*  $P < 0.01$ , \*\*\*  $P < 0.001$ , \*\*\*\*  $P < 0.0001$ .
